# Supplementary material
Source: Springer Nature journal article supplement (https://cannabishub.eu/wp-content/uploads/2026/04/41997_2025_1022_MOESM1_ESM-1.pdf)
Supplement: MOESM1 [file 41997_2025_1022_MOESM1_ESM-1.pdf]

| <b>Period</b> | <b>Substance Form</b>        | <b>Age Group</b>  | <b>Kruskal-Wallis Test Statistic</b> | <b>P-Value</b> |
|---------------|------------------------------|-------------------|--------------------------------------|----------------|
| Month         | All cases                    | All ages          | 2.64                                 | 0.99           |
| Month         | Cannabis edibles             | All ages          | 4.7                                  | 0.94           |
| Month         | Cannabis edibles             | 5 years and under | 9.1                                  | 0.61           |
| Month         | Cannabis edibles             | 6 to 12 years     | 12.55                                | 0.32           |
| Month         | Cannabis edibles             | 13 to 18 years    | 11.73                                | 0.38           |
| Month         | Cannabis edibles             | 19 to 29 years    | 5.76                                 | 0.89           |
| Month         | Cannabis edibles             | 30+ years         | 8.08                                 | 0.71           |
| Month         | Inhaled dried cannabis       | All ages          | 4.08                                 | 0.97           |
| Month         | Inhaled dried cannabis       | 13 to 18 years    | 3.35                                 | 0.99           |
| Month         | Inhaled dried cannabis       | 19 to 29 years    | 10.58                                | 0.48           |
| Month         | Inhaled dried cannabis       | 30+ years         | 12.28                                | 0.34           |
| Month         | Ingestible oils and capsules | All ages          | 5.24                                 | 0.92           |
| Month         | Ingestible oils and capsules | 19 to 29 years    | 10.15                                | 0.52           |
| Month         | Ingestible oils and capsules | 30+ years         | 8.89                                 | 0.63           |
| Month         | Inhaled concentrates         | All ages          | 13.21                                | 0.28           |
| Quarter       | All cases                    | All ages          | 0.39                                 | 0.94           |
| Quarter       | Cannabis edibles             | All ages          | 0.28                                 | 0.96           |
| Quarter       | Cannabis edibles             | 5 years and under | 0.06                                 | 1              |
| Quarter       | Cannabis edibles             | 6 to 12 years     | 0.19                                 | 0.98           |
| Quarter       | Cannabis edibles             | 13 to 18 years    | 4.56                                 | 0.21           |
| Quarter       | Cannabis edibles             | 19 to 29 years    | 0.28                                 | 0.96           |
| Quarter       | Cannabis edibles             | 30+ years         | 0.58                                 | 0.9            |
| Quarter       | Inhaled dried cannabis       | All ages          | 1.15                                 | 0.77           |
| Quarter       | Inhaled dried cannabis       | 13 to 18 years    | 0.38                                 | 0.95           |
| Quarter       | Inhaled dried cannabis       | 19 to 29 years    | 2.43                                 | 0.49           |
| Quarter       | Inhaled dried cannabis       | 30+ years         | 2.28                                 | 0.52           |
| Quarter       | Ingestible oils and capsules | All ages          | 0.65                                 | 0.88           |
| Quarter       | Ingestible oils and capsules | 19 to 29 years    | 2.16                                 | 0.54           |
| Quarter       | Ingestible oils and capsules | 30+ years         | 0.97                                 | 0.81           |
| Quarter       | Inhaled concentrates         | All ages          | 4.76                                 | 0.19           |
